# Supplementary material
Source: publisher figshare collection journal article supplement (https://gsajournals.figshare.com/ndownloader/files/26177171)
Supplement: Supplementary file 1 [file 26177171]

## Sheet: curated_SVs_in_CDS
#SV.id.in.74-D694(Sniffles)	SV.in.74-D694(CHROM,POS,REF,ALT)	SV.in.74-D694.assembly.aligned.to.S288C(CHROM,POS,REF,ALT)	SV.id.in.1A-D1628(Sniffles)	SV.in.1A-D1628(CHROM,POS,REF,ALT)	SV.in.1A-D1628.assembly.aligned.to.S288C(CHROM,POS,REF,ALT)	Gene(s)	known_genotype	PCR/Sanger_seq
259	NC_001133.9,204561,N,N[NC_001140.6:526550[		246	NC_001133.9,204719,N,N[NC_001140.6:526709[		FLO1
260	NC_001133.9,221422,N,]NC_001141.2:29553]N		247	NC_001133.9,221421,N,]NC_001141.2:29553]N		YAR066W
13	NC_001134.8,455271,AATGCCACAGCAACAGCAGCTGCAACAAGGTGT,N	NC_001134.8,455247,ACAACAGCAGCTGCAACAAGGTGTAATGCCACAG,A				AIM3
			12	NC_001134.8,530870,N,GAATTCGGAGCTCGTTTAAACTGGATGGCGGCGTTAGTATCGAATCGACAGCAGTATAGCGACCAGCATTCATGATACGATTGACGCATGATATTACTTTCTGCGCACTTAACTTCGCATCTGGGCAGATGATGTCGAGGCGAAAAAATATAAATCACGCTAACATTTGATTAAAATAGAACAACTACAATATAAAAACTATACAAATGACAAGTTCTTGAAAACAAGAATCTTTTATTGTCAGTACTTACATCAAAACACCTTTGGCTGAGGGAACGTCATTGTTACTGCTAGAAATAGCTTCTCTTATGGCAACAGCCAAAGCCTTGAACGTACTCACTTCTGTGGTGATCGTTGAAACCTCTCAGACAATCAACA…		SUP45	sup45::HIS3MX
29	NC_001136.10,927588,N,GCCACCGCTTACTGGTGCTGGTGCCGCTGCTGC	NC_001136.10,927552,A,ATGCCACCGCTACTGGTGCTGGTGCCGCTGC	25	NC_001136.10,927588,N,TGCTGCCGGCCACCGCTACTGGTGCCGGTGC	NC_001136.10,927552,A,ATGCCACCGCTACTGGTGCTGGTGCCGCTGC	HEM1
			28	NC_001136.10,1307967,TGTTGCAGTATCCTCGACGTACACGTCTTCACCATCAGCACCTGTTGCAATATCCTCAACGTACACGTCTTCACCATCGGTACCTGTTGCAGTATCCTCGACGTACACGTCTTCACCATCAGCACCTGCTGCAATATCCTCAACGTACACGTCTTCACCATCGGCACC,N	NC_001136.10,1307879,CACCTGTTGCAGTATCCTCGACGTACACGTCTTCACCATCAGCACCTGCTGCAATATCCTCAACGTACACGTCTTCACCATCGGCACCTGTTGCAGTATCCTCGACGTACACGTCTTCACCATCAGCACCTGTTGCAATATCCTCAACGTACACGTCTTCACCATCGGT,C	HKR1
32	NC_001136.10,1308602,ACATCCTCTCCATATGATATTGTTTACTCTCCATCAACTTTTGCTGCCATATCATCCGGTTACACGCCTTCACCTTCTGCTTCTGTCGCCATGTCATCTACTTCC,N	NC_001136.10,1308604,CTGTCATCTACTTCCACATCCTCTCCATATGATATTGTTTACTCTCCATCAACTTTTGCTGCCATATCATCCGGTTACACGCCTTCACCTTCTGCTTCTGTCGCCA,C				HKR1
36	NC_001136.10,1503889,N,TGAGAAGCTTCCAGCACTAGAAGCCTCCGCTGT					FIT1
37	NC_001136.10,1504103,GCGTTCACCCTCACCAGTCCATACGAAAGTAGCGTCCTGGGTGACGGTCTTTGTGTAGACATGTCCATTTTTGGTGGCTGTAATAGTGGTAGTTATACTCGAACCAGATCCTTCATCAGTAGAGGCAGAAGGTTCAGCAACAGATGTTACTGGAGAAGCAGCTGTTTCGACAGTAGCAACGGTTGAGACAGGAGC,N	NC_001136.10,1504095,GCAGGAGCGCGTTCACCCTCACCAGTCCATACGAAAGTAGCGTCCTGGGTGACGGTCTTTGTGTAGACATGTCCATTTTTGGTGGCTGTAATAGTGGTAGTTATACTCGAACCAGATCCTTCATCAGTAGAGGCAGAAGGTTCAGCAACAGATGTTACTGGAGAAGCAGCTGTTTCGACAGTAGCAACGGTTGAGA,G				FIT1
42	NC_001137.3,116287,N,TGTTGAATAGAAATCAACTATCATCTACTAACTAGTATTTACATTACTAGTATATTATCATATACGGTGTTAGGAAGATGACGCAAATGATGAGAAATAGTCATCTAAATTAGTGGAAGCTGAAACGCAAGGGATTGATAATGTAATAGATCAATGAATATAAACATATAAAATGATGATAATAATATTTATAGAATTGTGTAGAATTGCAGATTCCCTTTATGGATTCCTAAATTTGAGGAGAACTTCTAGTATATTCTGTATACCTAATATTATAGCCTTTATCAACAATGGAATCCCAACAATTATCTCAACATTCATAAGTTTCTCATGGTAGTGCCTGTGCTTCGGTTACTTCTAAGGGAAGTCCACACAAAT…	NC_001137.3,116281,C,CGTACCTGTTGGAATAGAAATCAACTATCATCTACTAACTAGTATTTACATTACTAGTATATTATCATATACGGTGTTAGAAGATGACGCAAATGATGAGAAATAGTCATCTAAATTAGTGGAAGCTGAAACGCAAGGATTGATAATGTAATAGGATCAATGAATATAAACATATAAAATGATGATAATAATATTTATAGAATTGTGTAGAATTGCAGATTCCCTTTTATGGATTCCTAAATCCTTGAGGAGAACTTCTAGTATATTCTGTATACCTAATATTATAGCCTTTATCAACAATGGAATCCCAACAATTATCTCAACATTCACATATTTCTCATGGTAGCGCCTGTGCTTCGGTTACTTCTAAGGAAGTCC…	32	NC_001137.3,116287,N,TGTTGGAATAGAAATCAACTATCATCTACTAGCTTCAAAGTATTTACATTACTAGTATATTATCATATACGGTGTTGAAGATGACATAAATGATAGAAATAGTCATCTAAATTAGTGGAAGCTGAAACGCAAGGATTGATAATGTAATAGGATCAATGAATATAAACATATAAAATGATGATAATAATATTTTATAGAATTGTGTAGAATTGCAGATTCCTTTATGGATTCCTAAATCGCAGGAGAACTTCTAGTATATTCTGTATACCTAATATTATAGCCTTTATCAACAATGGAATCCCAACAATTATCTCAACATTCACATATTTTCTCATGGTAGCGCCTGTGCTTCGGTTACTTCTAAGGAAGTCACACAAA…	NC_001137.3,116281,C,CGTACCTGTTGGAATAGAAATCAACTATCATCTACTAACTAGTATTTACATTACTAGTATATTATCATATACGGTGTTAGAAGATGACGCAAATGATGAGAAATAGTCATCTAAATTAGTGGAAGCTGAAACGCAAGGATTGATAATGTAATAGGATCAATGAATATAAACATATAAAATGATGATAATAATATTTATAGAATTGTGTAGAATTGCAGATTCCCTTTTATGGATTCCTAAATCCTTGAGGAGAACTTCTAGTATATTCTGTATACCTAATATTATAGCCTTTATCAACAATGGAATCCCAACAATTATCTCAACATTCACATATTTCTCATGGTAGCGCCTGTGCTTCGGTTACTTCTAAGGAAGTCC…	URA3	ura3-52
47	NC_001137.3,568487,N,TATCTTAGTGAGATTTCTTATTAACTGAACTTTCTTTGCTGCTGCTGGAGATTTGCACCTGCATAGCGCAGATTCTGCATCTTCTCAATAGAGTAGCTTAATTATTACATTCTTAGATGATGACAGATTGAGACTGGAATCTTTTGTCAGTAGCTGATGGATTTCTTTGTCAAAAAGCATAACAATCAACATACTCATTGTTAATTTCGAAACTTACAAAATAAAATGAAAGTTTCCGATAAGCGTAAATTTGAAAAAGCAAACTTTGAGGAGTTTGAGTTGGCTCTAAATAACAAAAACGACGGTACATTGCCACTATCAACTTTATTTGAATCGATGCGCACTGAAGTGCGATCATTCACGAAGACGAAAAGTCTG…		40	NC_001137.3,568487,N,TATCTTAGTGAGATTTATTAACTGAACTTTCTTTGCTGCTGCTGGAGATTTGCACCTGCATAGCGCAGATTCTGCATCTTCTCAAGAGTAGCTTAATTATTACATTCTTAGATGATGATAAGACGGAGACTGGACAATCTTTGTTTATATTGATGGATTTCTTTGTCAAAAGCATAACAATCAACATACTATTGTTAATTTCGAAACTTACAAAAATAAAATGAAAGTTTCGATAAGCGTAAATTTGAAAAAGCAAACTTTGAGGAGTTTGAGTTGGCTCTAAATAACAAAACGACTTGGTACATTGCCACCAATAACTTTATTTGAATCGATGCGCACGGAAGTGCGATCATTCTACGAAGACGAAAAGTCTGGTCT…		YER188W
271	NC_001138.5,30089,N,N[NC_001142.9:23971[					YFL051C
291	NC_001138.5,30150,N,N[NC_001142.9:23971[					YFL051C
55	NC_001139.9,348204,N,TGATACACAAGTAATAACAACAATATTAATAATAA	NC_001139.9,348161,A,ATAATAATAATGATACAAGTAATAACAACAATAT	44	NC_001139.9,348204,N,TGATACAAGTAATAACAACAATATTAATAATAA	NC_001139.9,348161,A,ATAATAATAATGATACAAGTAATAACAACAATAT	MAD1
61	NC_001139.9,519183,TGTTTCTCAAGTTTCAGACACACCAGTTTCTTATACAACTTCAAGTTCATCTGTTTCTCAAGTTTCAGACACACCGGTTTCTTATACAACTTCAAGTTCGTC,N	NC_001139.9,519129,GTCTGTTTCTCAAGTTTCAGACACACCGGTTTCTTATACAACTTCAAGTTCGTCTGTTTCTCAAGTTTCAGACACACCAGTTTCTTATACAACTTCAAGTTCA,G	50	NC_001139.9,519183,TGTTTCTCAAGTTTCAGACACACCAGTTTCTTATACAACTTCAAGTTCATCTGTTTCTCAAGTTTCAGACACACCGGTTTCTTATACAACTTCAAGTTCGTC,N	NC_001139.9,519129,GTCTGTTTCTCAAGTTTCAGACACACCGGTTTCTTATACAACTTCAAGTTCGTCTGTTTCTCAAGTTTCAGACACACCAGTTTCTTATACAACTTCAAGTTCA,G	MSB2
62	NC_001139.9,530057,N,CATCATCATCATCATCATCTCATCATCCATATCCTTATCCTCATCCTCATCCTCATCCTCATCCTCATCATCATCATCATCATCAT	NC_001139.9,530034,A,ATCATCATCATCATCATCATCATCATCATCATCATCATCATCATCATCCATATCCTTATCCTCATCCTCATCCTCATCCTCATCC	51	NC_001139.9,530057,N,CATCATCATCATCATCATCATCATCATCCATATCCTTATCCTCCTCCTCATCCTCATCCTCATCCTCATCATCATCATCATCATCAT	NC_001139.9,530034,A,ATCATCATCATCATCATCATCATCATCATCATCATCATCATCATCATCATCCATATCCTTATCCTCATCCTCATCCTCATCCTCATCC	MTL1
64	NC_001139.9,753276,N,CTGGTGGTAGTGGTTGTCGTAGTTGCAGTGTCAGCAGTTGCTTCCGTCTGGCCCTCAGATGTGTTAGTAGAAGTA	NC_001139.9,753189,C,CTGGTAGTAGAAGTACTGGTGGTAGTGGTTGTCGTAGTTGCAGTGTCAGCAGTTGCTTCAGTGGCCTCAGATG				YGR130C
70	NC_001139.9,1048440,N,AAGAAGACCGAAAACTATCGCAACAGATCCAGGACTCCAAT	NC_001139.9,1048437,G,GCCAAGAAGACCGAAAAACCATCGCAACAGATCCAGGACTCCA	56	NC_001139.9,1048440,N,AAGAAGACCGAAAAACCATCGCAACAGATCCAGGACTCCACC	NC_001139.9,1048437,G,GCCAAGAAGACCGAAAAACCATCGCAACAGATCCAGGACTCCA	CWC22
			255	NC_001139.9,1068849,N,N[NC_001148.4:931090[		IMA1
72	NC_001140.6,49394,N,CCACTACCAAGCACCACATCGTCGACTTCTA	NC_001140.6,49378,T,TCATCGTCGACTTCTACCACTACAAGCACCA			NC_001140.6,49378,T,TCATCGTCGACTTCTACCACTACAAGCACCA	WSC4
78	NC_001140.6,212267,N,<DUP>		59	NC_001140.6,212267,N,<DUP>		CUP1-1,YHR054C,CUP1-2,RSC30		+
79	NC_001140.6,213680,N,<DUP>		60	NC_001140.6,213357,N,<DUP>		CUP1-1,YHR054C,CUP1-2,RSC30		+
81	NC_001140.6,509679,N,AAAATGCCCTTTTTCAAATGAAATCAATGAATAATGGAGATATCATCAG	NC_001140.6,509653,G,GTCAATGAATAATGGAATATCATCAGAAAATGCCCTTTTTCAAATGAAA	62	NC_001140.6,509679,N,AAAATGCCCTTTTCAAATGAAATCAATGAATAATGGAATATCATCAG	NC_001140.6,509653,G,GTCAATGAATAATGGAATATCATCAGAAAATGCCCTTTTTCAAATGAAA	SCH9		+
83	NC_001140.6,525631,GATATTTCGATTGATTATAATATTCCCTGTGTTAGTT,N		64	NC_001140.6,525631,GATTGATTATAATATTCCCTGTGTTAGTTCATCAGGCACATT,N		FLO5		+
277	NC_001140.6,526286,N,N[NC_001141.2:26000[		258	NC_001140.6,526346,N,N[NC_001141.2:26000[		FLO5		+
278	NC_001140.6,526302,N,N[NC_001141.2:26000[					FLO5		+
84	NC_001141.2,23656,N,ATTAGTGTATGTCTTTGGAGAAACAGTAGTGGTTGTGGCTTCAGGGCCTCAGGGTGACAGTCTTAGTGTTACAGCCGTTGTCGTCACAGTGAGTAACAGTAACAGTAGTGTATGATTTTGGAAGTAGTAGTTGCTGGTTTTCTTCAGGACATTCAGAAGTGACAGTCTTGGTGCTACATCATTGTCATCACACTGAGTAACAGTAGC					CSS1		+
85	NC_001141.2,105352,N,CAATAATAATAATAATAATAATAATAATAATAATAATAATAATAATAATAATAATAATAATAATAA	NC_001141.2,105349,C,CAACAACAATAATAATAATAATAATAATAATAATAATAATAATAATAATAATAATAATAATAATAATAATAAT	65	NC_001141.2,105352,N,CAACAATAATAATAATAATAATAATAATAATAATAATAATAATAATAATAATAATAATAATAATAATAA	NC_001141.2,105349,C,CAACAACAATAATAATAATAATAATAATAATAATAATAATAATAATAATAATAATAATAATAATAATAATAAT	ASG1		+
91	NC_001141.2,246220,TGTTGGAATAAAAATCAACTATCATCTACTAACTAGTATTTACGTTACTAGTATATTATCATATACGGTGTTAGAAGATGACGCAAATGATGAGAAATAGTCATCTAAATTAGTGGAAGCTGAAACGCAAGGATTGATAATGTAATAGGATCAATGAATATTAACATATAAAATGATGATAATAATATTTATAGAATTGTGTAGAATTGCAGATTCCCTTTTATGGATTCCTAAATCCTCGAGGAGAACTTCTAGTACATTCTACATACCTAATATTATTGCCTTATTAAAAATGGAATCCCAACAATTATCTCAAAATTCACCAACTCTTCACATAC,N	NC_001141.2,246214,CCATACTGTTGGAATAAAAATCAACTATCATCTACTAACTAGTATTTACGTTACTAGTATATTATCATATACGGTGTTAGAAGATGACGCAAATGATGAGAAATAGTCATCTAAATTAGTGGAAGCTGAAACGCAAGGATTGATAATGTAATAGGATCAATGAATATTAACATATAAAATGATGATAATAATATTTATAGAATTGTGTAGAATTGCAGATTCCCTTTTATGGATTCCTAAATCCTCGAGGAGAACTTCTAGTACATTCTACATACCTAATATTATTGCCTTATTAAAAATGGAATCCCAACAATTATCTCAAAATTCACCAACTCTTCA,C	71	NC_001141.2,246220,TGTTGGAATAAAAATCAACTATCATCTACTAACTAGTATTTACGTTACTAGTATATTATCATATACGGTGTTAGAAGATGACGCAAATGATGAGAAATAGTCATCTAAATTAGTGGAAGCTGAAACGCAAGGATTGATAATGTAATAGGATCAATGAATATTAACATATAAAATGATGATAATAATATTTATAGAATTGTGTAGAATTGCAGATTCCCTTTTATGGATTCCTAAATCCTCGAGGAGAACTTCTAGTACATTCTACATACCTAATATTATTGCCTTATTAAAAATGGAATCCCAACAATTATCTCAAAATTCACCAACTCTTCACATAC,N	NC_001141.2,246214,CCATACTGTTGGAATAAAAATCAACTATCATCTACTAACTAGTATTTACGTTACTAGTATATTATCATATACGGTGTTAGAAGATGACGCAAATGATGAGAAATAGTCATCTAAATTAGTGGAAGCTGAAACGCAAGGATTGATAATGTAATAGGATCAATGAATATTAACATATAAAATGATGATAATAATATTTATAGAATTGTGTAGAATTGCAGATTCCCTTTTATGGATTCCTAAATCCTCGAGGAGAACTTCTAGTACATTCTACATACCTAATATTATTGCCTTATTAAAAATGGAATCCCAACAATTATCTCAAAATTCACCAACTCTTCA,C	YIL060W
95	NC_001141.2,382843,TGGCGCAGGCGCCATCCATGCTCCGTCATTAGTCGAAGACGCCTCAAGGAACGACGACGACGACGATGATGAAGACGACGACGACAGTTCCATGTCGCGAGA,N	NC_001141.2,382834,ATCGCGAGATGGCGCAGGCGCCATCCATGCTCCGTCATTAGTCGAAGACGCCTCAAGGAACGACGACGACGACGATGATGAAGACGACGACGACAGTTCCATG,A	75	NC_001141.2,382843,TGGCGCAGGCGCCATCCATGCTCCGTCATTAGTCGAAGACGCCTCAAGGAACGACGACGACGACGATGATGAAGACGACGACGACAGTTCCATGTCGCGAGA,N	NC_001141.2,382834,ATCGCGAGATGGCGCAGGCGCCATCCATGCTCCGTCATTAGTCGAAGACGCCTCAAGGAACGACGACGACGACGATGATGAAGACGACGACGACAGTTCCATG,A	YIR016W
97	NC_001141.2,390879,N,<DUP>		77	NC_001141.2,390879,N,<DUP>		FLO11
98	NC_001141.2,394310,N,<DUP>		78	NC_001141.2,394310,N,<DUP>		ICR1
103	NC_001142.9,332675,AGAATTATACGTTGCAGTATCATTATATTTTGTTAATGACGGATTATT,N	NC_001142.9,332667,TGATTATTAGAATTATACGTTGCAGTATCATTATATTTTGTTAATGACG,T	81	NC_001142.9,332675,AGAATTATACGTTGCAGTATCATTATATTTTGTTAATGACGGATTATT,N	NC_001142.9,332667,TGATTATTAGAATTATACGTTGCAGTATCATTATATTTTGTTAATGACG,T	ZAP1
106	NC_001142.9,367390,ACTAAATCGAATGAAAAAAAGGACAGTGGTTCTTCGAAGCCTGCCTTCTCATTCGGT,N	NC_001142.9,367386,TGGTACTAAATCGAATGAAAAAAAGGACAGTGGTTCTTCGAAGCCTGCCTTCTCATTC,T	84	NC_001142.9,367390,ACTAAATCGAATGAAAAAAAGGACAGTGGTTCTTCGAAGCCTGCCTTCTCATTCGGT,N	NC_001142.9,367386,TGGTACTAAATCGAATGAAAAAAAGGACAGTGGTTCTTCGAAGCCTGCCTTCTCATTC,T	NSP1		+
107	NC_001142.9,400226,N,AAGGTGCAGAGGGTACTGAAGGTGCAGAGGGTACTGAAGGTGCAGAGGGTACTGAAGGTGCAGAGGTACTGAAGGTGCA	NC_001142.9,400303,A,ACTAAAGGTGCAGAGGGTACTGAAGGTGCAGAGGGTACTGAAGGTGCAGAGGGTGCTGAAGGTACAGAGGGTG	85	NC_001142.9,400226,N,TGAAGGTGCAGAGGGTACTGAAGGTGCAGAGGGTACTGAAGGTGCAGAGGGTACTGAAAGGTGCAGAGGGTACTGAAGGTG	NC_001142.9,400303,A,ACTAAAGGTGCAGAGGGTACTGAAGGTGCAGAGGGTACTGAAGGTGCAGAGGGTGCTGAAGGTACAGAGGGTG	BBC1
113	NC_001142.9,715095,N,AAGCTGTAGAAGTTGTAGAAGTTGGTAGTTGTAGAAGTGGTAGAGGTTGTAG	NC_001142.9,715087,A,AGTTGTAGAAGTTGTAGAAGTTGTAGAAGTTGTAGAAGTTGTAGAAGTGGTAGAG	91	NC_001142.9,715095,N,AAGTTGTAGGTTGTAGAAGTTGTAGAAGTTGTAGAAGTGCAGAGGTTGTAG	NC_001142.9,715087,A,AGTTGTAGAAGTTGTAGAAGTTGTAGAAGTTGTAGAAGTTGTAGAAGTGGTAGAG	DAN4
115	NC_001143.9,311174,N,GTTGAATGGTTTCGGTCAGCAACCGAACAACAACTCTGGATCTTTATTCGGAAACAAGCCAGCAAGTGGCGGGTTATTTTGGTCAACAGGGCACTTCTACAAACACC	NC_001143.9,311165,G,GCAAACACCGTTAGTAGTTTCGGTCAGCAACCGAACAACAACTCTGGGTCTTTATTCGGAAACAAGCCAGCAAGTGGCGGGTTATTTGGTCAACAGGGCACTTCTA	93	NC_001143.9,311174,N,GTTAATAGTTCGGTCAACAACGAACAACAACTCTGGAGTCTTTATTCGGAAACAAGCCAGCAAGTGGCGGGTTATTTGGTCAACAGGGCACTTCTACAAACACC	NC_001143.9,311165,G,GCAAACACCGTTAGTAGTTTCGGTCAGCAACCGAACAACAACTCTGGGTCTTTATTCGGAAACAAGCCAGCAAGTGGCGGGTTATTTGGTCAACAGGGCACTTCTA	NUP100		+
121	NC_001143.9,647517,GCAAACTACACTAGCTCATTCTCATCGTCCAGTGAAGTCTGTACAGAGTGCACCGAAACTGAGTCTACTAGCACCTCTACTCCATATGTCACTAGCTCTTCCTGGTCGTCCAGTGAAGTCTGTACAGAGTGCACCGAGACCGAGTCTACCAGTTATGTGACACCATATGTCAGCTCGTCTACTGCTGCCGCAAACTACACTAGCTCATTCTCATCGTCCAGTGAAGTCTGTACAGAGTGCACCGAAACTGAGTCTACTAGCACCTCTACTCCATATGTCACTAGCTCTTCCTCGTCGTCCAGTGAAGTCTGTACAGAGTGCACCGAGACCGAGTCTACCAGTTATGTGACACCATATGTCAGCTCGTCTACTGCTG,N	NC_001143.9,647609,TAGCTCTTCCTGGTCGTCCAGTGAAGTCTGTACAGAGTGCACCGAGACCGAGTCTACCAGTTATGTGACACCATATGTCAGCTCGTCTACTGCTGCCGCAAACTACACTAGCTCATTCTCATCGTCCAGTGAAGTCTGTACAGAGTGCACCGAAACTGAGTCTACTAGCACCTCTACTCCATATGTCACTAGCTCTTCCTCGTCGTCCAGTGAAGTCTGTACAGAGTGCACCGAGACCGAGTCTACCAGTTATGTGACACCATATGTCAGCTCGTCTACTGCTGCCGCAAACTACACTAGCTCTTTCTCATCGTCCAGTGAAGTCTGTACAGAGTGCACCGAAACCGAGTCTACTAGCACCTCTACTCCATATGTCACC,T	99	NC_001143.9,647765,TGAGTCTACTAGCACCTCTACTCCATATGTCACTAGCTCTTCCTCGTCGTCCAGTGAAGTCTGTACAGAGTGCACCGAGACCGAGTCTACCAGTTATGTGACACCATATGTCAGCTCGTCTACTGCTGCCGCAAACTACACTAGCTCTTTCTCATCGTCCAGTGAAGTCTGTACAGAGTGCACCGAAACCGAGTCTACTAGCACCTCTACTCCATATGTCACCAGCTCTTCCTGGTCGTCCAGTGAAGTCTGTACAGAGTGCACCGAGACCGAGTCTACCAGTTATGTGACACCATATGTCAGCTCGTCTACTGCTGCCGCAAACTACACTAGCTCATTCTCATCGTCCAGTGAAGTCTGTACAGAGTGCACCGAAAC,N	NC_001143.9,647609,TAGCTCTTCCTGGTCGTCCAGTGAAGTCTGTACAGAGTGCACCGAGACCGAGTCTACCAGTTATGTGACACCATATGTCAGCTCGTCTACTGCTGCCGCAAACTACACTAGCTCATTCTCATCGTCCAGTGAAGTCTGTACAGAGTGCACCGAAACTGAGTCTACTAGCACCTCTACTCCATATGTCACTAGCTCTTCCTCGTCGTCCAGTGAAGTCTGTACAGAGTGCACCGAGACCGAGTCTACCAGTTATGTGACACCATATGTCAGCTCGTCTACTGCTGCCGCAAACTACACTAGCTCTTTCTCATCGTCCAGTGAAGTCTGTACAGAGTGCACCGAAACCGAGTCTACTAGCACCTCTACTCCATATGTCACC,T	FLO10
293	NC_001143.9,649175,N,N[NC_001148.4:929519[		263	NC_001143.9,649175,N,N[NC_001148.4:929519[		FLO10		+
283	NC_001143.9,649244,N,N[NC_001148.4:929585[		265	NC_001143.9,649244,N,N[NC_001148.4:929595[		FLO10		+
122	NC_001144.5,329761,N,TTGCTGTTGCTGTTGCTGCTGTTGCTGTTGTTGCTG	NC_001144.5,329729,G,GGTTGCTGTTGCTGTTGCTGTTGCTGTTGCTGTTGCTGTTGCT	101	NC_001144.5,329761,N,TTGCTGTTGCTGTTGCTGTTGCTGTTGCTGTTGCTGTTGCTG	NC_001144.5,329729,G,GGTTGCTGTTGCTGTTGCTGTTGCTGTTGCTGTTGCTGTTGCT	IOC2
125	NC_001144.5,650824,N,<DEL>	NC_001144.5,650818,TGATGGTGTTGGAATAAAAATCAACTATCATCTACTAACTAGTATTTACGTTACTAGTATATTATCATATACGGTGTTAGAAGATGACGCAAATGATGAGAAATAGTCATCTAAATTAGTGGAAGCTGAAACGCAAGGATTGATAATGTAATAGGATCAATGAATATTAACATATAAAACGATGATAATAATATTTATAGAATTGTGTAGAATTGCAGATTCCCTTTTATGGATTCCTAAATCCTCGAGGAGAACTTCTAGTATATTCTGTATACCTAATATTATAGCCTTTATCAACAATGGAATCCCAACAATTATCTCAACACCCACACATTTCTCATGGTAGCGCCTGTGCTTCGGTTACTTCTAAGGAAGTCCAC…	102	NC_001144.5,650824,N,<DEL>		HAP1
139	NC_001145.3,608975,N,<DUP>		115	NC_001145.3,608903,N,<DUP>		DDR48		+
			116	NC_001145.3,609498,N,CAATGACCTCTTACGGTTCCAACAACAATGACTCTTACGGTTCCAACAA		DDR48		+
		NC_001145.3,609729,T,TTCTAACAATGACGATTCATATGGTTCTAACAACAACGATTCCTACGGC	117	NC_001145.3,609645,TTATGGCTCTAACAATGATGATTCATATGGTTCTTCCAACAAGAAGAAGAGTTCTTATGGTTCCAGCAACAACGATTCGTATGGTTCTAACAACGATGATTCCTACGGTTCTTCTAACAAAAAGAAGAGTTCTTATGGTTCCAACAACGATGATTC,N	NC_001145.3,609729,T,TTCTAACAACGATGATTCATATGGTTCTAACAACGATGATTCATATGGTTCTAACAACAACGATTCCTACGGC	DDR48		+
140	NC_001145.3,609834,N,CTCCAGCAACAACAATGACTCTTACGGTTCCAACAATGACGACTTACGGTTCCAACAATGACGACTTACGG	NC_001145.3,609822,T,TGACTCTTACGGCTCCAGCAACAACAATGACTCTTACGGTTCCAACAATGACGACTCTTACGGTTCCAACAATGAC	118	NC_001145.3,609735,N,<DUP>	NC_001145.3,609795,T,TGATTCTTACGGCTCCAACAATGACGACTCTTACGGTTCGTCAAACAAGAATAAGAACTCTTACGGTTCTTCTAGCAACGATGATTCTTACGGTTCTTCCAATAACGACGACTCTTACGGTTCTTCCAACAAGAAGAAGAGCTCTTATGGTTCTAACAATGAC	DDR48		+
143	NC_001145.3,908354,TCAGTAAGTTCAGAAGCTCCATTGGCAACGTCTAGC,N		119	NC_001145.3,908354,TCAGTAAGTTCAGAAGCTCCATTGGCAACGTCTAGC,N		YMR317W
144	NC_001145.3,910342,N,GAAAAGTAAAGCTGCAGGAAATACATCCGTTGCAACGAATACTTCACCATCAACTTCCCCATCAGAA		120	NC_001145.3,908467,AAGTTCGGAAGCTCCATTGGCAACGTCTAGCGTAGTGAGTTCAGAAGCTCCATCGTCAACATCTAGCTCAGTGAGTTCAGAAGCTCCATCGTCAACATCTAGCTCAGT,N		YMR317W
			121	NC_001145.3,910342,N,GAAAGTAAAGCTGGCGGAAATACATCCGTTGCAACGAATACTTCACCATCAACTTCCCCATCAGA		YMR317W
148	NC_001146.8,290019,CGGCGAAGACATCGGTGAAGACATCGGTGAAGACATCGGTGAAGACAT,N		125	NC_001146.8,290019,CGGCGAAGACATCGGTGAAGACATCGGTGAAGACATCGGTGAAGACAT,N		UBP10
152	NC_001146.8,704472,GACATCTACATCTCCAAGCTCTACATCTACCTCATCAAGTTC,N		129	NC_001146.8,704472,GACATCTACATCTCCAAGCTCTACATCTACCTCATCAAGTTC,N		AGA1
153	NC_001146.8,720408,N,TTGCTGTTGTTGTTGCTGCTGTTGTTGTTGTTGCTGCTGTTGTTGCTG	NC_001146.8,720393,T,TTGCTGTTGTTGCTGTTGCTGTTGTTGTTGCTGCTGTTGTTGTTGTTGC	130	NC_001146.8,720408,N,TTGCTATTGTTGTTGCTGCTGTTGTTGTTGTTGCTGCTGTTGCTG	NC_001146.8,720393,T,TTGCTGTTGTTGCTGTTGCTGTTGTTGTTGCTGCTGTTGTTGTTGTTGC	POP2
155	NC_001147.6,31220,N,GCCTGATGTAATGAAGTGAACTGAGACTGATGAGCCCGATTCAGTGGCGGAGGATGA	NC_001147.6,31114,T,TTGAACCGGAGACTGATGAGCCCGATTCAGTGGCGGAGGATGAGCCTGATGTAATGGAAGTAGA				HPF1
160	NC_001147.6,236972,AACAGCAGCAACAACAACAGCAGCAACAACAAC,N	NC_001147.6,236958,GCAGCAGCAACAACAACAGCAGCAACAACAA,G			NC_001147.6,236958,GCAGCAGCAACAACAACAGCAGCAACAACAA,G	GAL11		+
			132	NC_001147.6,346473,AAGCTTCACTGGAAGAAGCGACGGCAGAAGAAGTAGCTTCACTGGAGGAAGCGACGGCAGAAGAAG,N	NC_001147.6,346462,AGCAGAAGAAGAAGCTTCACTGGAAGAAGCGACGGCAGAAGAAGTAGCTTCACTGGAGGAAGCGACG,A	TIR2
161	NC_001147.6,346525,GACGGCAGAAGAAGTAGTTTCACTGGAGGAAGC,N	NC_001147.6,346509,CTTCACTGGAGGAAGCGACGGCAGAAGAAGTAGT,C				TIR2
169	NC_001147.6,721741,ATTACTCTTGGCCTCCTCTAGTACACTCTATATTTTTTTATGCCTCGGTAATGATTTTCATTTTTTTTTTTCCACCTAGCGGATGACTCTTTTTTTTTCTTAGCGATTGGCATTATCACATAATGAATTATACATTATATAAAGTAATGTGATTTCTTCGAAGAATATACTAAAAAATGAGCAGGCAAGATAAACGAAGGCAAAGATGACAGAGCAGAAAGCCCTAGTAAAGCGTATTACAAATGAAACCAAGATTCAGATTGCGATCTCTTTAAAGGGTGGTCCCCTAGCGATAGAGCACTCGATCTTCCCAGAAAAAGAGGCAGAAGCAGTAGCAGAACAGGCCACACAATCGCAAGTGATTAACGTCCACACAGGTA…	NC_001147.6,721739,CTATTACTCTTGGCCTCCTCTAGTACACTCTATATTTTTTTATGCCTCGGTAATGATTTTCATTTTTTTTTTTCCACCTAGCGGATGACTCTTTTTTTTTCTTAGCGATTGGCATTATCACATAATGAATTATACATTATATAAAGTAATGTGATTTCTTCGAAGAATATACTAAAAAATGAGCAGGCAAGATAAACGAAGGCAAAGATGACAGAGCAGAAAGCCCTAGTAAAGCGTATTACAAATGAAACCAAGATTCAGATTGCGATCTCTTTAAAGGGTGGTCCCCTAGCGATAGAGCACTCGATCTTCCCAGAAAAAGAGGCAGAAGCAGTAGCAGAACAGGCCACACAATCGCAAGTGATTAACGTCCACACAGG…	140	NC_001147.6,721741,ATTACTCTTGGCCTCCTCTAGTACACTCTATATTTTTTTATGCCTCGGTAATGATTTTCATTTTTTTTTTTCCACCTAGCGGATGACTCTTTTTTTTTCTTAGCGATTGGCATTATCACATAATGAATTATACATTATATAAAGTAATGTGATTTCTTCGAAGAATATACTAAAAAATGAGCAGGCAAGATAAACGAAGGCAAAGATGACAGAGCAGAAAGCCCTAGTAAAGCGTATTACAAATGAAACCAAGATTCAGATTGCGATCTCTTTAAAGGGTGGTCCCCTAGCGATAGAGCACTCGATCTTCCCAGAAAAAGAGGCAGAAGCAGTAGCAGAACAGGCCACACAATCGCAAGTGATTAACGTCCACACAGGTA…	NC_001147.6,721739,CTATTACTCTTGGCCTCCTCTAGTACACTCTATATTTTTTTATGCCTCGGTAATGATTTTCATTTTTTTTTTTCCACCTAGCGGATGACTCTTTTTTTTTCTTAGCGATTGGCATTATCACATAATGAATTATACATTATATAAAGTAATGTGATTTCTTCGAAGAATATACTAAAAAATGAGCAGGCAAGATAAACGAAGGCAAAGATGACAGAGCAGAAAGCCCTAGTAAAGCGTATTACAAATGAAACCAAGATTCAGATTGCGATCTCTTTAAAGGGTGGTCCCCTAGCGATAGAGCACTCGATCTTCCCAGAAAAAGAGGCAGAAGCAGTAGCAGAACAGGCCACACAATCGCAAGTGATTAACGTCCACACAGG…	HIS3	his3-∆200
170	NC_001148.4,15501,N,GCAAAGTCTTCCCGCTACCGAATTCATCGCTGTTGTTGCTTGCAGCCTCAAACCTTAGACA		141	NC_001148.4,15501,N,GCAAAGTCTTTCCCGCTACCGAATTCATCGCTGTTGTTGCTTGCAGCCTCAAACCTTAGACA		YPL277C
175	NC_001148.4,193935,N,GCCTGGCCAACCAATGTACAAGAGAGAAGCCGACGTTGAGGCTTGGCATTGGTTGCACCAAA	NC_001148.4,193905,G,GGCTGAAGCTTGGCATTGGTTGCAACTAAAGCCTGGCCAACCAATGTACAAGAGAGAAGCCGAC	142	NC_001148.4,193935,N,AAGCCAAGAGAGAAGCCGACGCTGAAGGCTCTGCATTGGTTGTAACTAAAACCTGGCCAACCAAT	NC_001148.4,193905,G,GGCTGAAGCTTGGCATTGGTTGCAACTAAAGCCTGGCCAACCAATGTACAAGAGAGAAGCCGAC	MF(ALPHA)1		+
177	NC_001148.4,786450,N,GGGTATGTCGATGGGGAGGCAGTTCAATGTC	NC_001148.4,786427,A,AGCAGTTCAATGTCAGGTATGTCGATGGGAG	144	NC_001148.4,786450,N,GATGGGAGGCAGTTCAATGTCCAGGTATGTC	NC_001148.4,786427,A,AGCAGTTCAATGTCAGGTATGTCGATGGGAG	CTR1
200	NC_001224.1,24565,N,CTCCTCCGGCGTCCGCCCGCGGGCGGGCCGGA		170	NC_001224.1,24565,N,CTCTCTCTGGCGTCGCCCGCGGGCGGGCTGA	NC_001224.1,24564,T,TCTCCTCCGGCGTCCGCCCCGCGGGCGGGCCGGA	AI5_BETA
201	NC_001224.1,25185,N,TTCCGGGCCAGTCCGGGCGGAACTTGAAGGAAGGG		171	NC_001224.1,25185,N,TTCCAACCGGTCCAGGGACCGGAACCCTGAAGAGGAG	NC_001224.1,25182,T,TAGTTCCGGGCCCGGTCCAGGGACCGGAACCCCGAAGAGG	AI5_BETA

## Sheet: Genes_summary
74-D694					U-1A-D1628
Gene(s)	ngmlr-sniffles(SV_id)*	bam_confirmed	PCR/Sanger_seq	known genotype	Gene(s)	ngmlr-sniffles(SV_id)*	bam_confirmed	PCR/Sanger_seq	known genotype
AGA1	152	+			AGA1	129	+
AI5_BETA	200.201	+			AI5_BETA	170.171	+
AIM3	13	+
ASG1	85	+	+		ASG1	65	+	+
BBC1	107	+			BBC1	85	+
CSS1	84	+	+		CSS1	n.a.**	+	+
CTR1	177	+			CTR1	144	+
CUP1-1,YHR054C,CUP1-2,RSC30	78.79	+	+		CUP1-1,YHR054C,CUP1-2,RSC30	59,60	+	+
CWC22	70	+			CWC22	56	+
DAN4	113	+			DAN4	91	+
DDR48	139.14	+	+		DDR48	115,116,117,118	+	+
FIT1	36.37	+
FLO1	259	+			FLO1	246	+
FLO10	121,283,293	+	+		FLO10	99,263,265	+	+
FLO11	97	+			FLO11	77	+
FLO5	83,277,278	+	+		FLO5	64.258	+	+
GAL11	160	+	+		GAL11	n.a.**	+	+
HAP1	125	+			HAP1	102	+
HEM1	29	+			HEM1	25	+
HIS3	169	+		his3-∆200	HIS3	140	+		his3-∆200
HKR1	32	+			HKR1	28	+
HPF1	155	+
ICR1	98	+			ICR1	78	+
					IMA1	255	+
IOC2	122	+			IOC2	101	+
MAD1	55	+			MAD1	44	+
MF(ALPHA)1	175	+	+		MF(ALPHA)1	142	+	+
MSB2	61	+			MSB2	50	+
MTL1	62	+			MTL1	51	+
NSP1	106	+	+		NSP1	84	+	+
NUP100	115	+	+		NUP100	93	+	+
POP2	153	+			POP2	130	+
SCH9	81	+	+		SCH9	62	+	+
		+			SUP45	12	+		sup45::HIS3MX
TIR2	161	+			TIR2	132	+
UBP10	148	+			UBP10	125	+
URA3	42	+		ura3-52	URA3	32	+		ura3-52
WSC4	72	+			WSC4	n.a.**	+
YAR066W	260	+			YAR066W	247	+
YER188W	47	+			YER188W	40	+
YFL051C	271.291	+
YGR130C	64	+
YIL060W	91	+			YIL060W	71	+
YIR016W	95	+			YIR016W	75	+
YMR317W	143.144	+			YMR317W	119,120,121	+
YPL277C	170	+			YPL277C	141	+
ZAP1	103	+			ZAP1	81	+
*id of SVs from Sniffles results shown on Table S3
**n.a. indicates that no variation was annotated by Sniffles, even though manual inspection of the alignment suggested that the SV exists
